# Supplementary material for: Quantitative Profiling of Lysine Acetylation Reveals Dynamic Crosstalk between Receptor Tyrosine Kinases and Lysine Acetylation
Source: PLoS One. 2015 May 15;10(5):e0126242. doi: 10.1371/journal.pone.0126242 (PMC4433260; doi:10.1371/journal.pone.0126242)
Supplement: S2 Table — (XLSX) [file pone.0126242.s009.xlsx]

## Sheet: Sheet1
																	Standard Error
Protein	Sequence	Gene Name	Position	Novel	Cellular Localization	Biological Process	Sequence Observed in Other Organisms	Cluster	# Runs	0 Min	1 Min	5 Min	30 Min	1 Min	5 Min	30 Min	0 Min	1 Min	5 Min	30 Min	1 Min	5 Min	30 Min	Significant
AHNAK nucleoprotein isoform 1	K.GPKVKGEYDMTVPKLEGDLK.G + 2 Acetyl (K); iTRAQ8plex (K); Oxidation (M)	AHNAK	959/961	Yes/Yes	Nucleus	Protein Binding	Y	1	1	1	1.12291	0.967072	1.38649	0.949212	1.35762	1.42901
aldo-keto reductase family 1, member C1	K.YKPVCNQVECHPYFNQR.K + Acetyl (K); iTRAQ8plex (N-term)	AKR1C1	185	Yes	Cytosol	Oxidoreductase	Y	1	1	1	0.992955	1.10191	1.19774	1.28403	1.15015	1.35953
glucose-6-phosphate dehydrogenase isoform b	R.GPTEADELMKR.V + Acetyl (K); iTRAQ8plex (N-term)	G6PD	497	No	Cytosol	Glucose-6-phosphate dehydrogenase activity	Y	1	1	1	1.25504	1.09297	1.32616	1.51042	0.858509	1.27267
GTPase activating Rap/RanGAP domain-like 3	K.ATLETPTFAQKR.R + Acetyl (K); iTRAQ8plex (N-term)	GARNL3	395	No	Cytosol	GTPase activator activity	Y	1	2	1	0.962849	1.39131	1.41823	1.2321	1.5227	1.51746	0	0.246227	0.385481	0.181515	0.157868	0.152593	0.029859	*
nucleophosmin 1 isoform 1	K.VEAKFINYVK.N + Acetyl (K); iTRAQ8plex (K); iTRAQ8plex (N-term)	NPM1	267	No	Nucleus/Cytosol	Protein Binding	Y	1	2	1	1.01477	1.44024	1.52134	1.41429	1.40987	1.1424	0	0.0189642	0.195091	0.0716118	0.120376	0.133928	0.258614	*
PREDICTED: similar to hCG2042429	R.SMGILKVQK.E + Acetyl (K); iTRAQ8plex (K); iTRAQ8plex (N-term)	--	--	--	--	--	N	1	1	1	1.57853	1.26276	1.84838	1.25817	1.5879	1.75049
PREDICTED: similar to pyruvate kinase, muscle	K.GSGTAEVELKK.G + Acetyl (K); iTRAQ8plex (K); iTRAQ8plex (N-term)	PKM2	135	No	Nucleus/Cytosol	Protein Binding	Y	1	1	1	1.0411	1.3879	1.55484	1.34458	1.26432	1.32903
profilin 1	K.STGGAPTFNVTVTKTDK.T + Acetyl (K); iTRAQ8plex (K); iTRAQ8plex (N-term)	PFN1	105	No	Nucleus/Cytosol	Protein Binding	Y	1	1	1	1.62729	0.96653	1.51398	1.34323	1.62125	1.57018
aldolase A	K.DGADFAKWR.C + Acetyl (K); iTRAQ8plex (N-term)	ALDOA	147	No	Cytosol	Actin Binding	Y	2	1	1	0.579328	0.737815	0.739368	0.700445	0.970632	0.893694
clathrin heavy chain 1	K.QLPLVKPYLR.S + Acetyl (K); iTRAQ8plex (N-term)	CLTC	1449	Yes	Cytosol	Protein Binding	Y	2	1	1	0.76473	0.976386	0.830651	0.820115	1.07455	1.0118
CREB binding protein isoform b	R.KYEFSPQTLCCYGKQLCTIPR.D + Acetyl (K); iTRAQ8plex (K); iTRAQ8plex (N-term)	CBP	1203	No	Nucleus/Cytosol	Transcription Factor	Y	2	2	1	0.73085	0.959731	0.868822	0.818717	0.960805	1.07329	0	0.281283	0.0219106	0.181467	0.123606	0.0644299	0.135392
DEAD (Asp-Glu-Ala-Asp) box polypeptide 5	R.RCDELTRKMR.R + Acetyl (K); iTRAQ8plex (N-term); Oxidation (M)	DDX5	360	Yes	Nucleus	Protein Binding	Y	2	1	1	0.776022	0.812208	0.907427	0.751013	0.721406	0.933864
eukaryotic translation elongation factor 2	K.NPADLPKLVEGLKR.L + Acetyl (K); iTRAQ8plex (N-term)	EEF2	525	Yes	Cytosol	GTPase activity	Y	2	1	1	0.668046	1.05797	0.846988	0.895439	0.885974	1.10822
histone cluster 1, H2bn	K.KGSKKAVTKAQK.K + 4 Acetyl (K); iTRAQ8plex (K); iTRAQ8plex (N-term)		13/16/17/21	No/No/No/No	Nucleus	DNA binding	Y	2	1	1	0.9487	0.951124	0.751655	0.788874	0.92966	1.06157
inhibitor of growth family, member 4	K.QIESSDYDSSSSKGKK.S + 2 Acetyl (K); iTRAQ8plex (K); iTRAQ8plex (N-term)	ING4	127/129	No/No	Nucleus	Protein Binding	Y	2	1	1	1.13276	0.589476	0.847308	0.923913	0.773014	0.757604
IQ motif containing GTPase activating protein 2	K.YYDALVKAKELKSER.V + 3 Acetyl (K); iTRAQ8plex (N-term)	IQGAP2	585/587/590	Yes/Yes/Yes	Cytosol	GTPase inhibitor activity	Y	2	1	1	1.16326	0.436757	0.914369	0.814975	0.680506	0.982065
keratin 18	R.KVIDDTNITR.L + Acetyl (K); iTRAQ8plex (N-term)	KRT18	187	No	Cytosol	Protein Binding	Y	2	1	1	0.938377	1.01832	0.864179	0.842479	0.885506	1.19757
mitogen-activated protein kinase kinase kinase 10	R.GGPPKKEELVGGKK.K + 2 Acetyl (K); iTRAQ8plex (K)	MAP3K10	540/547	Yes/Yes	Cytosol	Protein Kinase Activity	Y	2	1	1	0.77094	0.913595	0.982313	0.939488	1.08681	1.11624
non-metastatic cells 2, protein (NM23B) expressed in	R.GLVGEIIKR.F + Acetyl (K); iTRAQ8plex (N-term)	NME1	26	No	Nucleus/Cytosol	Protein Binding	Y	2	1	1	1.01813	0.896831	0.712182	0.562981	0.832854	0.906155
PHD finger protein 17 long isoform	K.QSHKPLR.S + Acetyl (K); iTRAQ8plex (N-term)	PH517	596	Yes	Nucleus/Cytosol	Zinc Ion Binding	Y	2	1	1	1.28664	0.882817	0.974226	0.791491	0.711155	0.640983
ryanodine receptor 3	K.EYDPDGKGIISKK.E + 2 Acetyl (K); iTRAQ8plex (K)	RYR3	3867/3872	Yes/Yes	Plasma Membrane	Calcium Ion Binding	Y	2	1	1	0.72605	0.472623	0.334857	1.04992	1.01564	1.46439
sodium channel, voltage-gated, type X, alpha	K.KFQEALEMLRK.E + Acetyl (K); iTRAQ8plex (N-term)	SCN10A	417	Yes	Plasma Membrane	Voltage-gated sodium channel activity	Y	2	1	1	0.733944	0.6613	0.588382	0.804295	0.857509	1.08979
solute carrier family 25, member 5	K.QIFLGGVDKR.T + Acetyl (K); iTRAQ8plex (N-term)	SLC25A5	105	No	Plasma Membrane	Protein Binding	Y	2	1	1	0.616017	0.63803	0.882758	0.748722	0.855297	1.26684
solute carrier family 3 (activators of dibasic and neutral amino acid transport), member 2 isoform	R.LKLEPHEGLLLR.F + Acetyl (K); iTRAQ8plex (N-term)	SLC3A2	615	Yes	Plasma Membrane	Protein Binding	Y	2	1	1	0.822545	0.797529	1.2499	0.825476	0.870068	0.689606
structural maintenance of chromosomes 3	R.VIGAKKDQYFLDK.K + 2 Acetyl (K); iTRAQ8plex (K); iTRAQ8plex (N-term)	SMC3	105/106	No/No	Nucleus/Cytosol	Protein Binding	Y	2	3	1	0.882201	0.730261	0.870934	0.852529	0.894884	1.02725	0	0.114021	0.0420401	0.0955444	0.0766758	0.10603	0.0968855	*
annexin A2 isoform 2	R.SVPHLQKVFDR.Y + Acetyl (K); iTRAQ8plex (N-term)	ANXA2	227	No	Cytosol	Protein Binding	Y	3	1	1	0.984117	1.12402	1.28624	1.13318	0.953624	1.15694
enolase 1	R.LAKYNQLLR.I + Acetyl (K); iTRAQ8plex (N-term)	ENO1	406	No	Cytosol	Protein/DNA Binding	Y	3	1	1	1.52651	1.07762	1.27929	0.977462	1.24014	1.52309
enolase 1	R.SGKYDLDFK.S + Acetyl (K); iTRAQ8plex (K); iTRAQ8plex (N-term)	ENO1	256	No	Cytosol	Protein/DNA Binding	Y	3	2	1	0.977489	0.896541	1.40723	0.933366	0.953654	1.16809	0	0.0936182	0.0228669	0.216984	0.128189	0.10963	0.094265
eukaryotic translation elongation factor 1 gamma	K.AFNQGKIFK.- + Acetyl (K); iTRAQ8plex (K); iTRAQ8plex (N-term)	EEF1G	437	No	Cytosol	Protein Binding	Y	3	1	1	0.938244	1.01879	1.10066	1.12215	1.16063	1.0075
glucose-6-phosphate dehydrogenase isoform b	R.IIVEKPFGR.D + Acetyl (K); iTRAQ8plex (N-term)	G6PD	171	No	Cytosol	Glucose-6-phosphate dehydrogenase activity	Y	3	2	1	0.810434	1.23128	0.973933	0.800481	0.92556	0.931058	0	0.188763	0.119012	0.110517	0.143532	0.127304	0.104798
glyceraldehyde-3-phosphate dehydrogenase	K.TVDGPSGKLWR.D + Acetyl (K); iTRAQ8plex (N-term)	GAPDH	194	No	Cytosol	Protein Binding	Y	3	2	1	0.904275	1.18741	1.00439	0.744655	1.06362	0.872793	0	0.107237	0.0798548	0.151296	0.147138	0.106013	0.01724
H2A histone family, member Y isoform 2	K.NCLALADDKK.L + Acetyl (K); iTRAQ8plex (K); iTRAQ8plex (N-term)	H2AFY	304	No	Nucleus	DNA binding	Y	3	1	1	1.20767	1.07925	1.16159	0.936721	1.0039	1.14423
H3 histone, family 3A	R.KQLATKAAR.K + 2 Acetyl (K); iTRAQ8plex (N-term)	H3	19/24	No/No	Nucleus	DNA binding	Y	3	3	1	0.987375	1.43199	0.899499	0.971982	1.00167	0.984716	0	0.0530248	0.174204	0.0416019	0.162917	0.0501116	0.0290163
heat shock 70kDa protein 9 precursor	R.ETGVDLTKDNMALQR.V + Acetyl (K); iTRAQ8plex (N-term)	HSPA9B	300	No	Nucleus/Cytosol	Protein Binding	Y	3	1	1	1.00291	1.02977	0.983706	0.780208	1.19826	0.977959
histone cluster 1, H2bb	K.KGSKKAITK.A + 3 Acetyl (K); iTRAQ8plex (K); iTRAQ8plex (N-term)	H2B	13/16/17	No/No/No	Nucleus	DNA binding	Y	3	1	1	1.16812	0.929188	0.744537	0.939967	0.936657	1.03448
histone cluster 1, H2bb	K.KGSKKAITKAQK.K + 4 Acetyl (K); iTRAQ8plex (K); iTRAQ8plex (N-term)	H2B	13/16/17/21	No/No/No/No	Nucleus	DNA binding	Y	3	2	1	1.03424	1.1597	0.984017	1.15453	0.891125	1.11843	0	0.0366861	0.162032	0.162922	0.0352295	0.0926578	0.0396094
histone cluster 1, H2bl	K.SAPAPKKGSKKAVTKAQK.K + 5 Acetyl (K); iTRAQ8plex (K); iTRAQ8plex (N-term)	H2B1C	12/13/16/17/21	No/No/No/No/No	Nucleus	DNA binding	Y	3	1	1	0.899398	1.24497	0.77112	0.855087	0.989004	1.37108
histone cluster 1, H2bn	K.SAPAPKKGSKKAVTK.A + 4 Acetyl (K); iTRAQ8plex (K); iTRAQ8plex (N-term)	HIST1H2BC	12/13/16/17	No/No/No/No	Nucleus	DNA binding	Y	3	1	1	1.1826	1.27363	1.22315	0.895489	1.11701	1.15374
histone cluster 1, H2bn	M.PEPSKSAPAPK.K + Acetyl (K); iTRAQ8plex (K); iTRAQ8plex (N-term)	H2B	6	No	Nucleus	DNA binding	Y	3	1	1	1.15404	1.0291	0.929765	0.984622	0.998277	1.37527
histone cluster 1, H4a	K.GGKGLGKGGAKR.H + 3 Acetyl (K); iTRAQ8plex (N-term)	H4	9/13/17	No/No/No	Nucleus	DNA binding	Y	3	3	1	1.02811	1.21826	0.875148	0.870245	0.871998	0.983228	0	0.109792	0.0123668	0.10534	0.121201	0.121648	0.0716673	*
histone cluster 1, H4a	R.GKGGKGLGKGGAKR.H + 3 Acetyl (K); iTRAQ8plex (K); iTRAQ8plex (N-term)	H4	6/9/13	No/No/No	Nucleus	DNA binding	Y	3	3	1	0.746674	1.47426	0.977468	0.833384	0.997158	0.970975	0	0.0847493	0.265607	0.337444	0.0238322	0.05574	0.0838965	*
histone cluster 1, H4a	R.GKGGKGLGKGGAKR.H + 4 Acetyl (K); iTRAQ8plex (N-term)	H4	6/9/13/17	No/No/No/No	Nucleus	DNA binding	Y	3	3	1	1.10848	1.79741	0.956225	1.06705	1.04285	1.03047	0	0.0482471	0.189932	0.0685606	0.223364	0.0767393	0.0526276	*
histone cluster 2, H2bf	K.KGSKKAVTKVQK.K + 4 Acetyl (K); iTRAQ8plex (K); iTRAQ8plex (N-term)	H2B2F	13/16/16/21		Nucleus	DNA binding	Y	3	2	1	0.977519	1.18713	0.86925	0.990194	0.937637	1.10598	0	0.0926674	0.0907052	0.0572252	0.0782595	0.13164	0.00213256	*
keratin 18	R.VKYETELAMR.Q + Acetyl (K); iTRAQ8plex (N-term); Oxidation (M)	KRT18	167	No	Cytosol	Protein Binding	Y	3	2	1	1.12799	1.40847	1.19537	1.09808	1.04608	1.12985	0	0.0585359	0.0989103	0.0586131	0.142986	0.176158	0.00637474
keratin 8	K.FASFIDKVR.F + Acetyl (K); iTRAQ8plex (N-term)	KRT8	108	No	Cytosol	Protein Binding	Y	3	2	1	0.91436	1.03977	0.829872	1.05948	1.19146	1.20983	0	0.0452762	0.0644287	0.0179744	0.0618454	0.116699	0.0480845	*
keratin 8	K.NKYEDEINKR.T + Acetyl (K); iTRAQ8plex (K); iTRAQ8plex (N-term)	KRT8	178	No	Cytosol	Protein Binding	Y	3	1	1	1.36345	0.815505	0.899495	1.0473	1.17961	1.08948
keratin 8	R.LQAEIEGLKGQR.A + Acetyl (K); iTRAQ8plex (N-term)	KRT8	325	No	Cytosol	Protein Binding	Y	3	1	1	0.950329	0.992431	1.23574	0.784127	0.999428	0.856307
moesin	R.NISFNDKK.F + Acetyl (K); iTRAQ8plex (K); iTRAQ8plex (N-term)	MSN	253	No	Cytosol	Protein Binding	Y	3	1	1	1.08046	1.148	1.00138	1.00917	1.01621	1.04001
parathymosin	K.SVEAAAELSAKDLK.E + Acetyl (K); iTRAQ8plex (K); iTRAQ8plex (N-term)	PTMS	15	No	Nucleus/Cytosol	DNA replication	Y	3	1	1	1.11755	1.27486	1.05594	1.23438	1.31577	1.05987
PHD finger protein 15	R.CSKLPSSTKSGWPR.Q + 2 Acetyl (K); iTRAQ8plex (N-term)	PHF15	32/38	No/No	Unknown	Zinc Ion Binding	Y	3	1	1	0.915852	0.985931	1.03969	0.871161	0.981732	0.996188
polyamine modulated factor 1 binding protein 1	K.LQKGLLLDK.Q + Acetyl (K); iTRAQ8plex (N-term)	PMFBP1	364	Yes	Cytosol	Unknown	Y	3	1	1	0.961522	0.957811	1.13327	0.863277	0.927911	1.17288
PREDICTED: similar to hCG1996858	R.RIYKMKNAVK.V + Acetyl (K); iTRAQ8plex (K)	--	--	--	--	--	N	3	2	1	0.976068	0.949054	1.04691	1.0036	0.983742	1.18319	0	0.0957654	0.0143402	0.0663791	0.217086	0.133449	0.172133
PREDICTED: similar to heterogeneous nuclear ribonucleoprotein A1	R.SSGPYGGGGQYFAKPR.N + Acetyl (K); iTRAQ8plex (N-term)	HNRNPA1	350	No	Nucleus/Cytosol	RNA binding	Y	3	1	1	0.760854	1.62582	1.18604	0.986729	1.17604	0.957664
RAB11 family interacting protein 1 isoform 3	K.KSKIK.T + 2 Acetyl (K); iTRAQ8plex (K)	RAP11FIP	66/68	Yes/Yes	Cytosol	Protein Transport	Y	3	1	1	1.32359	0.856672	0.904081	0.960431	1.31857	1.0281
transgelin 2	R.NFSDNQLQEGKNVIGLQMGTNR.G + Acetyl (K); iTRAQ8plex (N-term)	TAGLN2	171	No	Plasma Membrane	Protein Binding	Y	3	1	1	1.00257	1.08468	1.18547	1.05156	1.37432	1.14293
transketolase	R.KLILDSAR.A + Acetyl (K); iTRAQ8plex (N-term)	TKT	543	Yes	Nucleus/Cytosol	Cofactor Binding	Y	3	1	1	0.99057	1.25382	1.35825	0.983867	1.06735	1.28634
tumor rejection antigen (gp96) 1	K.NKEIFLR.E + Acetyl (K); iTRAQ8plex (N-term)	HSP90	41	Yes	Plasma Membrane	Protein Binding	Y	3	1	1	0.741814	1.2839	0.950606	0.932052	1.23029	1.11992
beta actin	K.DSYVGDEAQSKR.G + Acetyl (K); iTRAQ8plex (N-term)	ACTA1	63	No	Cytosol	Protein Binding	Y	4	2	1	0.696497	0.702005	0.540855	0.608976	0.662972	0.745201	0	0.00805219	0.294557	0.0647056	0.190386	0.21667	0.150969
collagen, type XXV, alpha 1 isoform 2	K.KHAGKGGGR.E + Acetyl (K); iTRAQ8plex (N-term)	COL25A1	9	Yes	Plasma Membrane	Heparin Binding	Y	4	2	1	0.896482	0.786842	0.62253	0.782299	0.778804	0.759256	0	0.138043	0.00151156	0.126268	0.0452674	0.138279	0.0594945	**
H3 histone, family 3A	K.QLATKAAR.K + Acetyl (K); iTRAQ8plex (N-term)	H3	24	No	Nucleus	DNA binding	Y	4	3	1	0.783796	0.657514	0.649573	0.674716	0.542298	0.692774	0	0.165468	0.0994794	0.0762798	0.173722	0.0569955	0.0432171	**
H3 histone, family 3A	R.KQLATKAAR.K + Acetyl (K); iTRAQ8plex (K); iTRAQ8plex (N-term)	H3	19	No	Nucleus	DNA binding	Y	4	3	1	0.711751	0.52276	0.528781	0.552526	0.522284	0.626166	0	0.183732	0.100482	0.146828	0.08784	0.0620676	0.0547243
histone cluster 1, H2bl	K.KAVTKAQK.K + 2 Acetyl (K); iTRAQ8plex (K); iTRAQ8plex (N-term)	H2B1C	17/21	No/No	Nucleus	DNA binding	Y	4	1	1	0.554571	0.464407	0.364837	0.572332	0.613545	0.725426
histone cluster 1, H2bl	K.KGSKKAVTKAQKK.D + 5 Acetyl (K); iTRAQ8plex (K)	HIST1H2BC	13/16/17/21/22	No/No/No/No/Yes	Nucleus	DNA binding	Y	4	1	1	0.77787	0.952064	0.529539	0.696911	0.704728	0.87132
histone cluster 1, H2bm	K.KGSKKAINKAQK.K + 4 Acetyl (K); iTRAQ8plex (K)	HIST1H2BM	13/16/17/21	No/No/No/No	Nucleus	DNA binding	Y	4	1	1	0.594085	0.572576	0.349001	0.419159	0.546351	0.692921
histone cluster 1, H2bn	K.GSKKAVTKAQK.K + 3 Acetyl (K); iTRAQ8plex (K); iTRAQ8plex (N-term)	HIST1H2BC	16/17/21	No/No/No	Nucleus	DNA binding	Y	4	1	1	0.904762	0.512788	0.602969	0.494377	0.529652	0.874393
histone cluster 1, H4a	K.GGKGLGKGGAK.R + 2 Acetyl (K); iTRAQ8plex (K); iTRAQ8plex (N-term)	H4	9/13	No/No	Nucleus	DNA binding	Y	4	2	1	0.666066	0.529352	0.458171	0.667533	0.657899	0.859792	0	0.0164303	0.112673	0.0838679	0.345128	0.189935	0.179181
histone cluster 1, H4a	K.GLGKGGAKR.H + 2 Acetyl (K); iTRAQ8plex (N-term)	H4	13/17	No	Nucleus	DNA binding	Y	4	3	1	0.895893	0.885034	0.701147	0.724588	0.684541	0.787615	0	0.0515633	0.0293028	0.0416526	0.130851	0.0944842	0.0981948
histone cluster 1, H4a	R.GKGGKGLGK.G + 2 Acetyl (K); iTRAQ8plex (K); iTRAQ8plex (N-term)	H4	6/9	No/No	Nucleus	DNA binding	Y	4	2	1	0.553796	0.496915	0.370583	0.577667	0.561552	0.594279	0	0.0212108	0.0885009	0.00264348	0.234261	0.14753	0.0721077	*
histone cluster 2, H2bf	K.AVTKVQK.K + Acetyl (K); iTRAQ8plex (K); iTRAQ8plex (N-term)	H2B2F	21	No	Nucleus	DNA binding	Y	4	1	1	0.534702	0.499453	0.397873	0.636638	0.480886	0.601758
keratin 8	K.TLNNKFASFIDK.V + Acetyl (K); iTRAQ8plex (K); iTRAQ8plex (N-term)	KRT8	101	No	Cytosol	Protein Binding	Y	4	1	1	1.1197	0.379332	0.628578	0.895992	0.303788	0.793506
nuclear mitotic apparatus protein 1	R.RGASKKALSK.A + 2 Acetyl (K); iTRAQ8plex (K)	NUMA1	2070/2071	No/No	Cytosol	Protein Binding	Y	4	1	1	1.16492	0.597465	0.570369	0.659924	0.517181	0.761922
SPT2, Suppressor of Ty, domain containing 1	K.ALEEKR.R + Acetyl (K); iTRAQ8plex (N-term)	SPTY2D1	63	No	--	--	Y	4	1	1	1.5195	0.316208	0.37702	0.410917	0.768728	0.846104
taste receptor T2R5	K.QTCQKILWK.T + Acetyl (K); iTRAQ8plex (K); iTRAQ8plex (N-term)	TAS2R5	268	Yes	Plasma Membrane	Signal Transduction	Y	4	1	1	0.271208	0.573976	0.725635	0.652352	0.846695	0.797467
complexin 1	K.QALGGATKDMGK.M + Acetyl (K); iTRAQ8plex (K); iTRAQ8plex (N-term)	CPLX1	14	Yes	Cytosol	Syntaxin-1 Binding	Y	5	1	1	0.959264	2.68063	1.89421	2.23333	1.43497	1.0702
H2A histone family, member J	R.GKQGGKVR.A + 2 Acetyl (K); iTRAQ8plex (N-term)	H2AFJ	6/10	No/No	Nucleus	DNA binding	Y	6	1	1	0.415454	0.505275	0.112931	0.563055	0.389157	0.347315
H2A histone family, member V isoform 1	K.AGKDSGKAK.A + 2 Acetyl (K); iTRAQ8plex (K); iTRAQ8plex (N-term)	H2AFV	8/12	No/No	Nucleus	DNA binding	Y	6	1	1	0.216053	0.311464	0.199935	0.353151	0.243802	0.392964
H2A histone family, member V isoform 1	M.AGGKAGKDSGKAK.A + 3 Acetyl (K); iTRAQ8plex (K); iTRAQ8plex (N-term)	H2AFV	5/8/12	No/No/No	Nucleus	DNA binding	Y	6	1	1	0.26169	0.278902	0.171472	0.3903	0.228978	0.33606
H3 histone, family 3A	K.STGGKAPR.K + Acetyl (K); iTRAQ8plex (N-term)	H3	15	No	Nucleus	DNA binding	Y	6	1	1	0.288614	0.330091	0.219869	0.40112	0.398332	0.451645
H3 histone, family 3A	R.KSTGGKAPR.K + 2 Acetyl (K); iTRAQ8plex (N-term)	H3	10/15	No/No	Nucleus	DNA binding	Y	6	2	1	0.58769	0.486786	0.389935	0.373396	0.331102	0.436188	0	0.39027	0.323302	0.302296	0.259768	0.205201	0.277282
histone cluster 1, H2bn	K.SAPAPKKGSK.K + 2 Acetyl (K); iTRAQ8plex (K); iTRAQ8plex (N-term)	HIST1H2BC	12/13	No/No	Nucleus	DNA binding	Y	6	1	1	0.206052	0.163247	0.20738	0.116741	0.208041	0.221337
histone cluster 1, H2bn	K.SAPAPKKGSKK.A + 3 Acetyl (K); iTRAQ8plex (K); iTRAQ8plex (N-term)	HIST1H2BC	2016-12-13	No/No/No	Nucleus	DNA binding	Y	6	2	1	0.449166	0.388309	0.177393	0.419065	0.402624	0.512985	0	0.0819356	0.127533	0.0142329	0.271754	0.164621	0.11765	**
histone cluster 1, H4a	K.GLGKGGAK.R + Acetyl (K); iTRAQ8plex (K); iTRAQ8plex (N-term)	H4	13	No	Nucleus	DNA binding	Y	6	1	1	0.356287	0.398317	0.241741	0.592946	0.441684	0.599917
junctophilin 2 isoform 1	R.GLTKAGAK.K + Acetyl (K); iTRAQ8plex (K); iTRAQ8plex (N-term)	JPH2	647	No	Plasma Membrane	Protein Binding	Y	6	1	1	0.159904	0.126271	0.185286	0.167313	0.179975	0.241895
SWI/SNF-related matrix-associated actin-dependent regulator of chromatin a2 isoform b	K.GKGGAK.T + Acetyl (K); iTRAQ8plex (K)	H4	9	No	Nucleus	DNA binding	Y	6	1	1	0.318941	0.357175	0.238109	0.467774	0.32071	0.421489
