# Supplementary material for: Quantitative Profiling of Lysine Acetylation Reveals Dynamic Crosstalk between Receptor Tyrosine Kinases and Lysine Acetylation
Source: PLoS One. 2015 May 15;10(5):e0126242. doi: 10.1371/journal.pone.0126242 (PMC4433260; doi:10.1371/journal.pone.0126242)
Supplement: S6 Table — (XLSX) [file pone.0126242.s013.xlsx]

## Sheet: Sheet1
			DMSO		TSA
Protein	GI	Sequence	- EGF	+ EGF	- EGF	+ EGF	FCR
phosphoinositol 3-phosphate-binding protein-3 [Homo sapiens]	gi|37595548	AEEPGGHAyETPREEIAR	1	2.16779	0.964961	1.43007	0.683645
Src homology 2 domain containing adaptor protein B [Homo sapiens]	gi|106879210	AGKGESAGyMEPYEAQR	1	2.17394	1.7817	2.31212	0.596937
neural precursor cell expressed, developmentally down-regulated 9 isoform 1 [Homo sapiens]	gi|5453680	ANPQERDGVyDVPLHNPPDAK	1	0.840017	1.29192	1.21172	1.11654
plectin 1 isoform 3 [Homo sapiens]	gi|41322908	ARQEELySELQAR	1	1.12249	1.1191	1.28466	1.02268
Rho GTPase activating protein 12 [Homo sapiens]	gi|26986534	AtTPPNQGRPDSPVyANLQELK	1	1.05883	1.08989	0.840037	0.727931
kin of IRRE like [Homo sapiens]	gi|34419631	AVLyADYR	1	1.78729	1.17761	1.22519	0.582111
GRB2-associated binding protein 1 isoform a [Homo sapiens]	gi|46370071	DASSQDcyDIPR	1	6.10935	1.52079	5.40972	0.58225
neural precursor cell expressed, developmentally down-regulated 9 isoform 1 [Homo sapiens]	gi|5453680	DGVyDVPLHNPPDAK	1	0.691895	1.06329	0.965316	1.31213
Src homology 2 domain containing adaptor protein B [Homo sapiens]	gi|106879210	DKVTIADDySDPFDAK	1	1.38468	0.94691	1.28719	0.981715
pragmin [Homo sapiens]	gi|157909822	EATQPEPIyAESTK	1	1.07441	1.17983	0.990617	0.781479
talin 2 [Homo sapiens]	gi|156938343	EcDySIDGINR	1	1.01021	1.11601	1.15361	1.02324
SHC (Src homology 2 domain containing) transforming protein 1 isoform p52Shc [Homo sapiens]	gi|32261324	ELFDDPSyVNVQNLDK	1	16.9389	1.54782	15.8189	0.60335
aldehyde dehydrogenase 1A1 [Homo sapiens]	gi|21361176	ELGEyGFHEYTEVK	1	1.29049	0.843064	1.07753	0.990415
partitioning-defective protein 3 homolog [Homo sapiens]	gi|21361831	ERDyAEIQDFHR	1	1.06539	1.09317	1.1897	1.02151
tensin 3 [Homo sapiens]	gi|65288071	ESMcSTPAFPVSPETPyVK	1	0.974402	1.35624	1.98956	1.5055
paxillin [Homo sapiens]	gi|4506345	FIHQQPQSSsPVyGSSAK	1	1.38454	1.49833	1.3931	0.671534
glycogen synthase kinase 3 alpha [Homo sapiens]	gi|49574532	GEPNVSyIcSR	1	1.08399	1.12237	1.08951	0.895514
coiled-coil domain containing 123 [Homo sapiens]	gi|50083293	GGHSDDLyAVPHR	1	1.16047	0.72359	0.664965	0.791904
Na+/K+ -ATPase alpha 1 subunit isoform a proprotein [Homo sapiens]	gi|21361181	GIVVyTGDR	1	1.11377	1.07398	1.0268	0.858402
cortactin isoform a [Homo sapiens]	gi|20357552	GPVSGTEPEPVYSMEAADyR	1	1.65938	1.24407	1.6848	0.81613
epidermal growth factor receptor isoform a [Homo sapiens]	gi|29725609	GSHQISLDNPDyQQDFFPK	1	10.9066	0.869691	10.6094	1.1185
epidermal growth factor receptor isoform a [Homo sapiens]	gi|29725609	GSTAENAEyLR	1	4.32602	0.976219	4.25996	1.00872
aldo-keto reductase family 1, member B10 [Homo sapiens]	gi|20127592	HIDcAYVyQNEHEVGEAIQEK	1	1.13178	1.16483	1.52247	1.15485
mitogen-activated protein kinase 14 isoform 1 [Homo sapiens]	gi|4503069	HTDDEMTGyVATR	1	2.97109	1.95502	3.54248	0.609872
junction plakoglobin [Homo sapiens]	gi|4504811	HVAAGTQQPyTDGVR	1	1.57323	0.952976	1.29448	0.86342
tensin [Homo sapiens]	gi|66529407	HVAYGGySTPEDR	1	1.03764	1.01896	1.14378	1.08178
catenin, delta 1 isoform 1A [Homo sapiens]	gi|146231938	HYEDGYPGGSDNyGSLSR	1	1.74084	1.35559	1.70486	0.72244
FYVE, RhoGEF and PH domain containing 6 [Homo sapiens]	gi|154240686	HyEEIPEYENLPFIMAIR	1	0.592365	0.954856	0.929668	1.64362
mitogen-activated protein kinase 3 isoform 2 [Homo sapiens]	gi|91718897	IADPEHDHTGFLTEyVATR	1	3.18121	1.03455	3.64783	1.10839
membrane associated guanylate kinase, WW and PDZ domain containing 1 isoform b [Homo sapiens]	gi|66346708	IEDPVyGIYYVDHINR	1	0.910205	0.675589	0.84022	1.36638
cell division cycle 2 protein isoform 1 [Homo sapiens]	gi|4502709	IGEGTyGVVYK	1	1.16387	1.38827	1.07884	0.667695
protein tyrosine phosphatase, non-receptor type 11 [Homo sapiens]	gi|33356177	IQNTGDYyDLYGGEK	1	1.7859	1.08022	1.59154	0.824986
dual-specificity tyrosine-(Y)-phosphorylation regulated kinase 1A isoform 3 [Homo sapiens]	gi|18765750	IYQyIQSR	1	1.14718	1.01278	1.09053	0.938631
tensin 3 [Homo sapiens]	gi|65288071	KLSLGQyDNDAGGQLPFSK	1	1.18376	1.52742	1.59613	0.882765
tyrosine kinase, non-receptor, 2 isoform 1 [Homo sapiens]	gi|56549666	KPTyDPVSEDQDPLSSDFKR	1	1.00386	1.33251	0.838695	0.626992
serine/threonine-protein kinase PRP4K [Homo sapiens]	gi|89276756	LcDFGSASHVADNDITPyLVSR	1	1.7468	1.27269	1.73542	0.780617
protein-tyrosine kinase fyn isoform a [Homo sapiens]	gi|4503823	LIEDNEyTAR	1	0.755518	1.10517	0.77823	0.932038
Src homology 2 domain containing adaptor protein B [Homo sapiens]	gi|106879210	LPQDDDRPADEyDQPWEWNR	1	2.15209	1.12892	1.9632	0.808055
carboxypeptidase D precursor [Homo sapiens]	gi|22202611	LRQHHDEyEDEIR	1	0.800944	0.807485	0.973346	1.50498
tensin 3 [Homo sapiens]	gi|65288071	LSLGQyDNDAGGQLPFSK	1	1.11366	1.09199	1.34824	1.10865
NKF3 kinase family member [Homo sapiens]	gi|148368962	NAIKVPIVINPNAyDNLAIYK	1	1.20665	1.44839	1.55597	0.890296
LIM domain containing preferred translocation partner in lipoma [Homo sapiens]	gi|5031887	NDSDPTyGQQGHPNTWK	1	1.07403	0.828947	0.886871	0.996133
glucocorticoid receptor DNA binding factor 1 [Homo sapiens]	gi|150417981	NEEENIySVPHDSTQGK	1	1.123	0.821782	1.07011	1.15956
cyclin-dependent kinase-like 5 [Homo sapiens]	gi|4507281	NLSEGNNANYTEyVATR	1	1.41128	1.11889	1.54849	0.980642
vinculin isoform VCL [Homo sapiens]	gi|4507877	NPGNQAAyEHFETMK	1	1.08305	1.32675	1.34689	0.93733
glucose-6-phosphate dehydrogenase isoform b [Homo sapiens]	gi|108773793	NSYVAGQyDDAASYQR	1	0.898947	0.802111	0.991507	1.37508
neural precursor cell expressed, developmentally down-regulated 9 isoform 1 [Homo sapiens]	gi|5453680	QAGRPDLRPEGVyDIPPTcTKPAGK	1	0.665634	1.33906	0.945148	1.06039
connexin 43 [Homo sapiens]	gi|4504001	QASEQNWANySAEQNR	1	1.2473	1.33522	1.37608	0.826273
tensin 3 [Homo sapiens]	gi|65288071	QQQmVVAHQySFAPDGEAR	1	1.28433	1.40798	1.88339	1.04152
intersectin 2 isoform 3 [Homo sapiens]	gi|22325381	REEPEALyAAVNK	1	1.39453	1.09469	1.26951	0.831608
epidermal growth factor receptor isoform a [Homo sapiens]	gi|29725609	RPAGSVQNPVyHNQPLNPAPSR	1	1.52188	1.11112	1.63968	0.969659
RNA binding motif protein 17 [Homo sapiens]	gi|14249678	RPDPDSDEDEDyERER	1	1.81586	0.83728	0.618117	0.406554
myelin protein zero-like 1 isoform a [Homo sapiens]	gi|4506357	SESVVyADIR	1	1.25325	0.947739	1.1344	0.955082
solute carrier family 38, member 2 [Homo sapiens]	gi|21361602	SHyADVDPENQNFLLESNLGK	1	1.72443	1.32777	1.94782	0.850709
catenin, delta 1 isoform 1A [Homo sapiens]	gi|146231938	SLDNNySTPNER	1	2.79704	0.982606	0.767265	0.279169
erbB-3 isoform 1 precursor [Homo sapiens]	gi|54792100	SLEATDSAFDNPDyWHSR	1	0.978277	1.42258	1.0804	0.776331
phosphoinositide-3-kinase, regulatory subunit 2 (beta) [Homo sapiens]	gi|4826908	SREYDQLyEEYTR	1	1.0526	1.26957	1.57886	1.18148
GRB2-associated binding protein 1 isoform a [Homo sapiens]	gi|46370071	SSGSGSSVADERVDyVVVDQQK	1	3.04501	0.620565	2.99002	1.58233
glucocorticoid receptor DNA binding factor 1 [Homo sapiens]	gi|150417981	SVSSSPWLPQDGFDPSDyAEPMDAVVKPR	1	0.618788	1.4842	0.864853	0.941688
annexin A2 isoform 2 [Homo sapiens]	gi|4757756	SYSPyDMLESIR	1	1.37355	0.876694	1.1045	0.91722
discoidin, CUB and LCCL domain containing 2 [Homo sapiens]	gi|54792129	TDScSSAQAQyDTPK	1	1.92183	0.452451	0.612945	0.70491
inositol polyphosphate phosphatase-like 1 [Homo sapiens]	gi|4755142	TLSEVDyAPAGPAR	1	6.7201	1.04946	4.51318	0.639944
cortactin isoform a [Homo sapiens]	gi|20357552	TQTPPVSPAPQPTEERLPSSPVyEDAASFK	1	1.18973	1.77396	1.57447	0.746005
homeodomain interacting protein kinase 3 isoform 1 [Homo sapiens]	gi|114796624	TVcSTyLQSR	1	0.908254	0.972432	0.874223	0.989819
plakophilin 4 isoform a [Homo sapiens]	gi|53829374	TVHDMEQFGQQQyDIYER	1	1.35347	1.12523	1.29771	0.852095
mitogen-activated protein kinase 1 [Homo sapiens]	gi|20986531	VADPDHDHTGFLTEyVATR	1	1.93099	1.04623	2.52059	1.24766
Yamaguchi sarcoma viral (v-yes-1) oncogene homolog isoform A [Homo sapiens]	gi|4505055	VENcPDELyDIMK	1	1.24368	1.30045	1.30893	0.809309
paxillin [Homo sapiens]	gi|4506345	VGEEEHVySFPNK	1	0.792524	1.33268	0.853056	0.807683
glucose-6-phosphate dehydrogenase isoform b [Homo sapiens]	gi|108773793	VGFQyEGTYK	1	1.27813	1.28468	1.47833	0.90033
breast cancer anti-estrogen resistance 1 [Homo sapiens]	gi|44662836	VGQGYVYEAAQPEQDEyDIPR	1	1.57042	1.58255	1.39199	0.560093
Wiskott-Aldrich syndrome gene-like protein [Homo sapiens]	gi|51702526	VIyDFIEK	1	0.658035	1.26444	0.673096	0.808963
ephrin receptor EphA2 [Homo sapiens]	gi|32967311	VLEDDPEATyTTSGGK	1	1.1918	0.904278	0.907878	0.84241
breast cancer anti-estrogen resistance 1 [Homo sapiens]	gi|44662836	VLPPEVADGGVVDSGVyAVPPPAER	1	0.966592	0.356328	1.05694	3.06872
NKF3 kinase family member [Homo sapiens]	gi|148368962	VPIVINPNAYDNLAIyK	1	1.70699	2.27203	1.76154	0.4542
fer (fps/fes related) tyrosine kinase [Homo sapiens]	gi|119964721	VQENDGKEPPPVVNyEEDAR	1	1.81285	1.19945	1.32431	0.609041
Src homology 2 domain containing adaptor protein B [Homo sapiens]	gi|106879210	VTIADDySDPFDAK	1	1.31825	0.714592	1.25198	1.32905
protein tyrosine phosphatase, receptor type, A isoform 1 precursor [Homo sapiens]	gi|4506303	VVQEYIDAFSDyANFK	1	1.00991	1.01068	1.11681	1.09417
tensin 3 [Homo sapiens]	gi|65288071	WDSYENLSADGEVLHTQGPVDGSLyAK	1	0.286094	0.63875	0.576843	3.15659
signal transducer and activator of transcription 3 isoform 2 [Homo sapiens]	gi|21618338	YcRPESQEHPEADPGAAPyLK	1	1.42323	1.72335	1.77415	0.723341
PTK2B protein tyrosine kinase 2 beta isoform a [Homo sapiens]	gi|27886584	yIEDEDYYKASVTR	1	1.3753	1.37184	1.49379	0.791747
PTK2 protein tyrosine kinase 2 isoform a [Homo sapiens]	gi|24476013	YmEDSTYyK	1	0.970502	1.4493	0.818504	0.581926
